# Supplementary material for: Indirect determination of partial depolymerization reactions in dialdehyde celluloses (DAC) by gel permeation chromatography of their oxime derivatives
Source: Springer Nature journal article supplement (doi:10.1007/s10570-023-05412-4), 2023-07-27
Supplement: MOESM1 [file 25856462]

# SUPPLEMENTARY MATERIAL

## Indirect Determination of Depolymerization Reactions in Dialdehyde Celluloses (DAC) by Gel Permeation Chromatography of Their Oxime Derivatives

Lukas Fliri<sup>a</sup>, Jonas Simon<sup>b</sup>, Irina Sulaeva<sup>b</sup>, Thomas Rosenau<sup>b</sup>, Antje Potthast<sup>b,\*</sup> and Michael Hummel<sup>a,\*</sup>

<sup>a</sup> Department of Bioproducts and Biosystems, Aalto University, FI-00076 Aalto, Finland

<sup>b</sup> Department of Chemistry, Institute of Chemistry of Renewable Resources, University of Natural Resources and Life Sciences Vienna (BOKU), Konrad-Lorenz-Strasse 24, 3430 Tulln, Austria

\*Corresponding authors: [antje.pothast@boku.ac.at](mailto:antje.pothast@boku.ac.at); [michael.hummel@aalto.fi](mailto:michael.hummel@aalto.fi)

### Contents

|                                                            |    |
|------------------------------------------------------------|----|
| <b>1) Additional data for Experiments 1</b> .....          | S2 |
| <b>2) Additional data for Experiments 2</b> .....          | S4 |
| <b>3) Additional data for Experiments 3</b> .....          | S7 |
| <b>4) Preparation of solutions for Experiments 3</b> ..... | S9 |

## 1) Additional data for Experiments 1

**Table S1.** Reaction times and GPC-MALLS statistical moments for the time dependent oximation of the samples **1a** which were soluble in the LiCl/DMAc medium. The values in **1a** did not change significantly from the beginning to the end of the monitoring, suggesting a quantitative transformation already after overnight reaction and the absence of severe side reactions.

| <b>1a: DO = 7.1 ± 1.1 %</b> |             |                            |                            |                            |           |                    |
|-----------------------------|-------------|----------------------------|----------------------------|----------------------------|-----------|--------------------|
| Reaction time / h           | Entry       | $M_n / \text{kg mol}^{-1}$ | $M_w / \text{kg mol}^{-1}$ | $M_z / \text{kg mol}^{-1}$ | $\bar{D}$ | slope <sup>a</sup> |
| 0                           | <b>CL</b>   | 94.6                       | 145.6                      | 200.2                      | 1.5       | 0.67               |
| 19                          | <b>1a-1</b> | 36.2                       | 68.7                       | 102.9                      | 1.9       | 0.70               |
| 26                          | <b>1a-2</b> | 38.6                       | 70.8                       | 105.7                      | 1.8       | 0.58               |
| 42.5                        | <b>1a-3</b> | 39.2                       | 69.3                       | 99.9                       | 1.8       | 0.75               |
| 50                          | <b>1a-4</b> | 38.1                       | 69.5                       | 102.3                      | 1.8       | 0.72               |
| 74                          | <b>1a-5</b> | 36.9                       | 67.5                       | 100.2                      | 1.8       | 0.66               |
| 144.5                       | <b>1a-6</b> | 35.4                       | 66.8                       | 100.7                      | 1.9       | 0.64               |
| 170                         | <b>1a-7</b> | 38.3                       | 70.6                       | 104.9                      | 1.8       | 0.66               |

a) Slopes (scaling parameter) of the linear regression of the multiangle light-scattering data in the conformation plot.

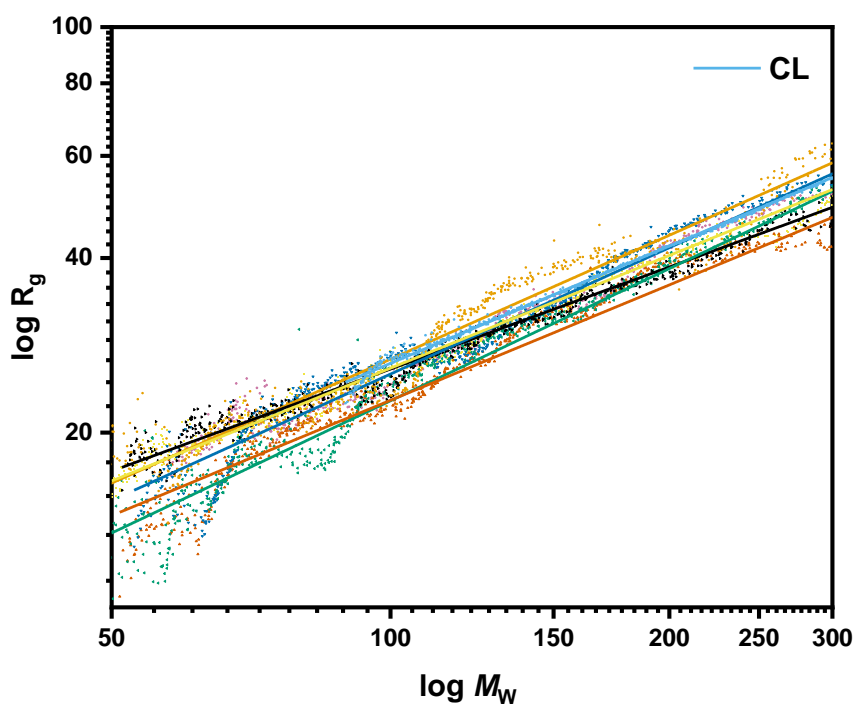

**Figure S1.** Conformation plots according to GPC for experiments **1a**.

**Table S2.** Reaction times and GPC-MALLS statistical moments for the time dependent oximation of the samples **1b** which were soluble in the LiCl/DMAc medium. In **1b** persistent crosslinks were observed and the values did not stabilize even after 170 h reaction time.

| <b>1b: DO = 9.2 ± 0.3 %</b> |             |                              |                              |                              |           |                    |
|-----------------------------|-------------|------------------------------|------------------------------|------------------------------|-----------|--------------------|
| Reaction time / h           | Entry       | $M_n$ / kg mol <sup>-1</sup> | $M_w$ / kg mol <sup>-1</sup> | $M_z$ / kg mol <sup>-1</sup> | $\bar{D}$ | slope <sup>a</sup> |
| 0                           | <b>CL</b>   | 94.6                         | 145.6                        | 200.2                        | 1.5       | 0.67               |
| 19                          | <b>1b-1</b> | 40.5                         | 125.3                        | 290.7                        | 3.1       | 0.56               |
| 26                          | <b>1b-2</b> | 44.1                         | 125.5                        | 287.7                        | 2.9       | 0.56               |
| 42.5                        | <b>1b-3</b> | 41.1                         | 123.3                        | 297.1                        | 3.0       | 0.46               |
| 50                          | <b>1b-4</b> | 29.8                         | 108.8                        | 278.8                        | 3.7       | 0.46               |
| 74                          | <b>1b-5</b> | 43.7                         | 119.4                        | 276.4                        | 2.7       | 0.45               |
| 144.5                       | <b>1b-6</b> | 30.6                         | 107.8                        | 274.6                        | 3.5       | 0.55               |
| 170                         | <b>1b-7</b> | 32.3                         | 110.2                        | 271.2                        | 3.4       | 0.46               |

a) Slopes of the linear regression of the multiangle light-scattering data in the conformation plot.

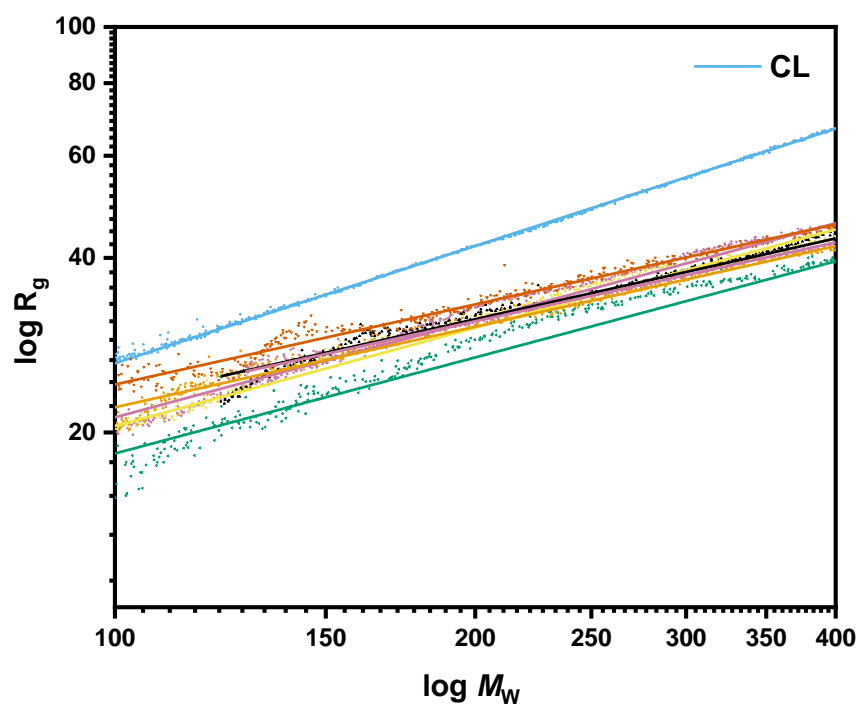

**Figure S2.** Conformation plots according to GPC for experiments **1b**.

## 2) Additional data for Experiments 2

**Table S3.** Reaction times, DO values and GPC-MALLS statistical moments for the time dependent periodate oxidation with 0.5 eq NaIO<sub>4</sub> (**Experiment 2a**).

| Entry | Reaction time / h | DO / %    | $M_n$ / kg mol <sup>-1</sup> | $M_w$ / kg mol <sup>-1</sup> | $M_z$ / kg mol <sup>-1</sup> | $\mathcal{D}$ |
|-------|-------------------|-----------|------------------------------|------------------------------|------------------------------|---------------|
| CL    | 0.0               | 0         | 101.3                        | 145.9                        | 194.0                        | 1.4           |
| 2a-1  | 0.33              | 1.7 ± 0.4 | 81.4                         | 123.6                        | 167.0                        | 1.5           |
| 2a-2  | 0.67              | 1.8 ± 0.7 | 77.9                         | 118.6                        | 159.8                        | 1.5           |
| 2a-3  | 1.0               | 2.3 ± 0.4 | 70.3                         | 109.4                        | 149.8                        | 1.6           |
| 2a-4  | 1.33              | 2.0 ± 0.5 | 75.2                         | 104.5                        | 132.7                        | 1.4           |
| 2a-5  | 1.67              | 4.1 ± 0.3 | 69.9                         | 106.7                        | 143.3                        | 1.5           |
| 2a-6  | 2.0               | 3.9 ± 0.5 | 66.3                         | 103.7                        | 141.5                        | 1.6           |
| 2a-7  | 2.75              | 3.6 ± 0.4 | 60.9                         | 98.1                         | 137.8                        | 1.6           |
| 2a-8  | 20.0              | 7.4 ± 0.5 | 36.5                         | 66.2                         | 97.0                         | 1.8           |
| 2a-9  | 22.0              | 8.0 ± 1.3 | 37.8                         | 66.7                         | 97.0                         | 1.8           |
| 2a-10 | 24.0              | 8.7 ± 1.5 | 35.7                         | 66.0                         | 97.9                         | 1.8           |

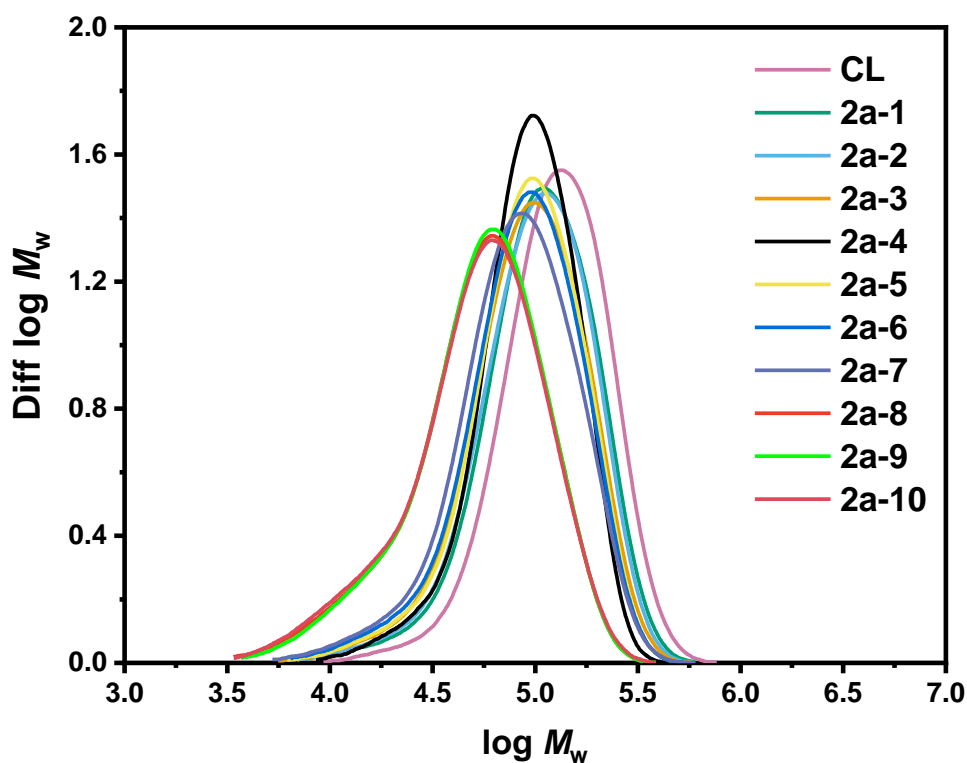

**Figure S3.** Molecular weight distributions according to GPC for experiments 2a.

| <b>Table S4.</b> Reaction times, DO values and GPC-MALLS statistical moments for the time dependent periodate oxidation with 1 eq NaIO <sub>4</sub> ( <b>Experiment 2b</b> ). |                   |            |                              |                              |                              |           |
|-------------------------------------------------------------------------------------------------------------------------------------------------------------------------------|-------------------|------------|------------------------------|------------------------------|------------------------------|-----------|
| Entry                                                                                                                                                                         | Reaction time / h | DO / %     | $M_n$ / kg mol <sup>-1</sup> | $M_w$ / kg mol <sup>-1</sup> | $M_z$ / kg mol <sup>-1</sup> | $\bar{D}$ |
| <b>CL</b>                                                                                                                                                                     | 0.0               | 0          | 94.6                         | 145.6                        | 200.2                        | 1.5       |
| <b>2b-1</b>                                                                                                                                                                   | 0.33              | 1.8 ± 0.5  | 65.0                         | 111.6                        | 159.8                        | 1.7       |
| <b>2b-2</b>                                                                                                                                                                   | 0.67              | 1.0 ± 0.7  | 64.6                         | 108.6                        | 154.7                        | 1.7       |
| <b>2b-3</b>                                                                                                                                                                   | 1.0               | 2.2 ± 0.8  | 58.5                         | 96.4                         | 134.5                        | 1.6       |
| <b>2b-4</b>                                                                                                                                                                   | 1.33              | 2.4 ± 1.0  | 59.3                         | 95.4                         | 132.5                        | 1.6       |
| <b>2b-5</b>                                                                                                                                                                   | 1.67              | 2.0 ± 1.3  | 62.6                         | 97.6                         | 131.7                        | 1.6       |
| <b>2b-6</b>                                                                                                                                                                   | 2.0               | 3.0 ± 1.7  | 55.1                         | 86.2                         | 117.9                        | 1.6       |
| <b>2b-7</b>                                                                                                                                                                   | 3.0               | 3.3 ± 0.4  | 54.8                         | 84.0                         | 111.7                        | 1.5       |
| <b>2b-8</b>                                                                                                                                                                   | 18.0              | 8.7 ± 0.3  | Insoluble                    |                              |                              |           |
| <b>2b-9</b>                                                                                                                                                                   | 21.0              | 9.6 ± 0.3  |                              |                              |                              |           |
| <b>2b-10</b>                                                                                                                                                                  | 24.0              | 11.4 ± 0.3 |                              |                              |                              |           |

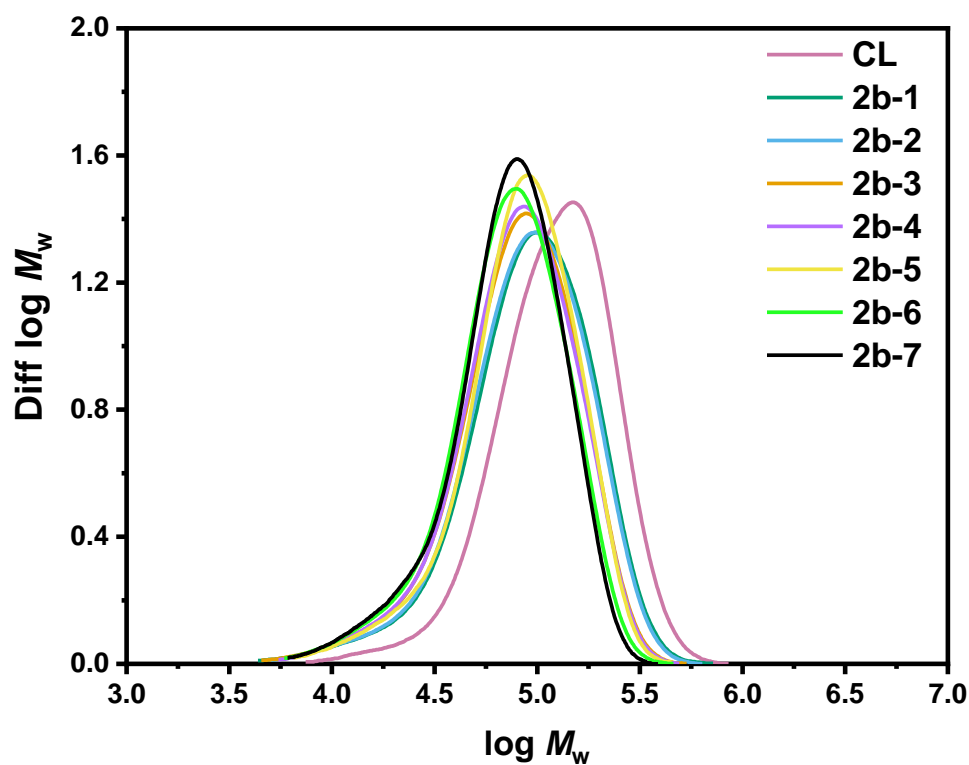

**Figure S4.** Molecular weight distributions according to GPC for experiments 2b.

| <b>Table S5.</b> Reaction times, DO values and GPC-MALLS statistical moments for the time dependent periodate oxidation with 2 eq NaIO <sub>4</sub> ( <b>Experiment 2c</b> ). |                   |            |                              |                              |                              |           |
|-------------------------------------------------------------------------------------------------------------------------------------------------------------------------------|-------------------|------------|------------------------------|------------------------------|------------------------------|-----------|
| Entry                                                                                                                                                                         | Reaction time / h | DO / %     | $M_n$ / kg mol <sup>-1</sup> | $M_w$ / kg mol <sup>-1</sup> | $M_z$ / kg mol <sup>-1</sup> | $\bar{D}$ |
| <b>CL</b>                                                                                                                                                                     | 0.0               | 0          | 87.3                         | 146.2                        | 212.9                        | 1.7       |
| <b>2c-1</b>                                                                                                                                                                   | 0.33              | 4.0 ± 0.7  | 58.8                         | 98.4                         | 138.9                        | 1.7       |
| <b>2c-2</b>                                                                                                                                                                   | 0.67              | 4.0 ± 0.5  | 56.4                         | 91.5                         | 124.9                        | 1.6       |
| <b>2c-3</b>                                                                                                                                                                   | 1.0               | 4.6 ± 0.3  | 49.4                         | 84.0                         | 118.1                        | 1.7       |
| <b>2c-4</b>                                                                                                                                                                   | 1.33              | 4.5 ± 0.4  | 48.3                         | 83.6                         | 118.6                        | 1.7       |
| <b>2c-5</b>                                                                                                                                                                   | 1.67              | 6.0 ± 0.4  | 46.4                         | 81.3                         | 117.2                        | 1.8       |
| <b>2c-6</b>                                                                                                                                                                   | 2.0               | 7.2 ± 1.9  | 45.4                         | 78.2                         | 112.8                        | 1.7       |
| <b>2c-7</b>                                                                                                                                                                   | 3.0               | 6.6 ± 0.6  | 40.8                         | 73.2                         | 108.0                        | 1.8       |
| <b>2c-8</b>                                                                                                                                                                   | 19.0              | 17.1 ± 0.3 | Insoluble                    |                              |                              |           |
| <b>2c-9</b>                                                                                                                                                                   | 21.5              | 18.6 ± 0.1 |                              |                              |                              |           |
| <b>2c-10</b>                                                                                                                                                                  | 24.0              | 20.0 ± 0.5 |                              |                              |                              |           |

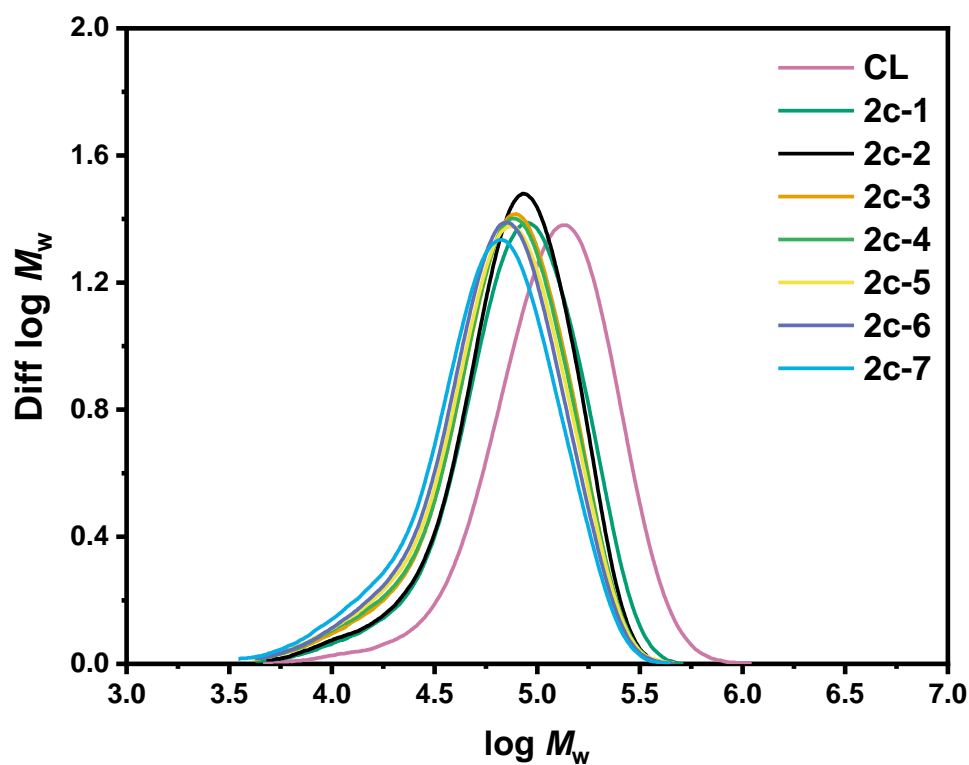

**Figure S5.** Molecular weight distributions according to GPC for experiments 2c.

### 3) Additional data for Experiments 3

**Table S6.** Solvent systems, DO values after treatment and GPC-MALLS statistical moments for the pH dependent degradation study of unmodified DAC (**Experiment 3a**).

| Entry             | solvent          | DO / %         | $M_n /$<br>kg mol <sup>-1</sup> | $M_w /$<br>kg mol <sup>-1</sup> | $M_z /$<br>kg mol <sup>-1</sup> | $\bar{D}$ |
|-------------------|------------------|----------------|---------------------------------|---------------------------------|---------------------------------|-----------|
| CL                | -                | -              | 90.2                            | 142.9                           | 197.0                           | 1.6       |
| 3a-0 <sup>a</sup> | -                | 5.9            | 55.2                            | 83.5                            | 113.9                           | 1.5       |
| 3a-1              | H <sub>2</sub> O | 5.6            | 52.7                            | 80.8                            | 112.0                           | 1.5       |
| 3a-2              | HCl              | 6.0            | 46.5                            | 84.3                            | 132.1                           | 1.8       |
| 3a-3              | HOAc             | 6.0            | 50.7                            | 83.6                            | 120.1                           | 1.6       |
| 2a-4              | pH3              | 6.0            | 53.8                            | 85.4                            | 120.6                           | 1.6       |
| 3a-5              | pH5              | 5.2            | 49.7                            | 81.9                            | 118.8                           | 1.6       |
| 3a-6              | pH7              | 5.4            | 55.4                            | 80.0                            | 107.0                           | 1.4       |
| 3a-7              | pH9              | 2.2            | 30.7                            | 44.5                            | 58.6                            | 1.5       |
| 3a-8              | pH11             | - <sup>b</sup> | 22.3                            | 35.0                            | 47.8                            | 1.6       |
| 3a-9              | NH <sub>3</sub>  | 0.9            | 30.6                            | 41.9                            | 52.8                            | 1.4       |
| 3a-10             | NaOH             | - <sup>b</sup> | 22.3                            | 32.3                            | 42.6                            | 1.4       |

a) DAC – Oxime before treatment. b) below detection limit of the FTIR analysis.

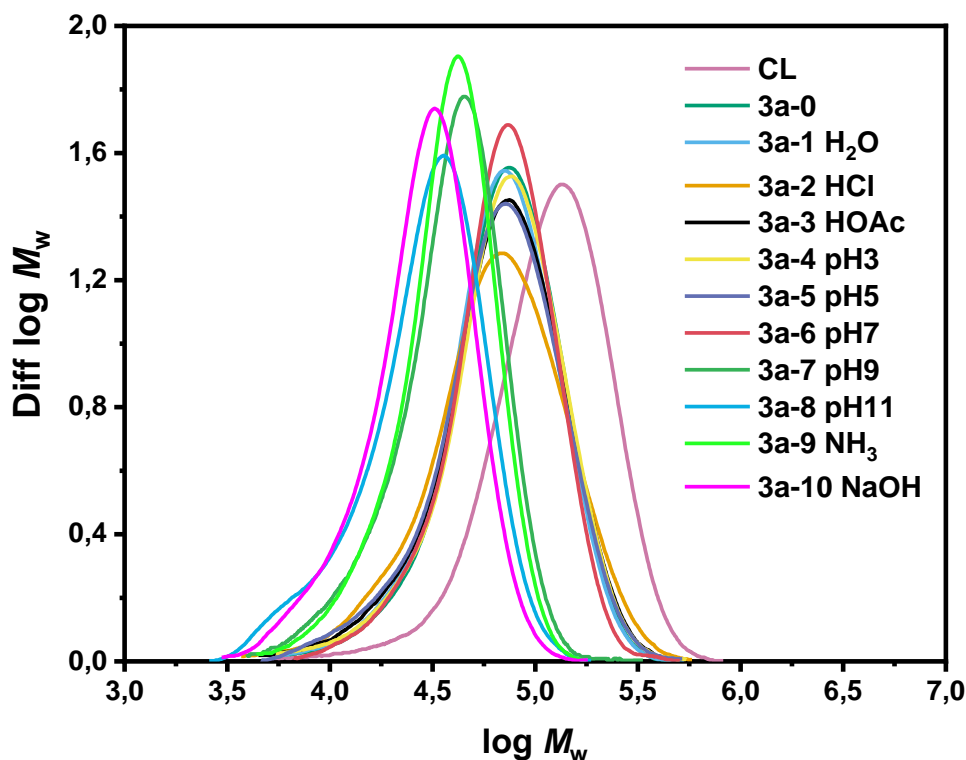

**Figure S6.** Molecular weight distributions according to GPC for experiments 3a.

**Table S7.** Solvent systems and GPC-MALLS statistical moments for the pH dependent degradation study of DAC oximes (**Experiment 3b**). For the study the same DAC (DO = 5.9%) as in **Experiments 3a** were used.

| Entry             | solvent          | $M_n / \text{kg mol}^{-1}$ | $M_w / \text{kg mol}^{-1}$ | $M_z / \text{kg mol}^{-1}$ | $\bar{D}$ |
|-------------------|------------------|----------------------------|----------------------------|----------------------------|-----------|
| CL                | -                | 90.2                       | 142.9                      | 197.0                      | 1.6       |
| 3b-0 <sup>a</sup> | -                | 56.8                       | 89.7                       | 127.1                      | 1.6       |
| 3b-1              | H <sub>2</sub> O | 52.0                       | 87.6                       | 131.0                      | 1.7       |
| 3b-2              | HCl              | 33.7                       | 69.3                       | 118.2                      | 2.1       |
| 3b-3              | HOAc             | 42.6                       | 88.6                       | 148.2                      | 2.1       |
| 2b-4              | pH3              | 51.8                       | 90.8                       | 140.7                      | 1.8       |
| 3b-5              | pH5              | 48.7                       | 82.6                       | 123.1                      | 1.7       |
| 3b-6              | pH7              | 49.8                       | 81.5                       | 117.8                      | 1.6       |
| 3b-7              | pH9              | 58.4                       | 70.2                       | 81.5                       | 1.2       |
| 3b-8              | pH11             | 32.5                       | 45.8                       | 59.3                       | 1.4       |
| 3b-9              | NH <sub>3</sub>  | 56.0                       | 64.4                       | 72.4                       | 1.2       |
| 3b-10             | NaOH             | 34.1                       | 48.4                       | 63.9                       | 1.4       |

a) DAC – Oxime (sample **3a-0**) after storage at 4°C for 3 days

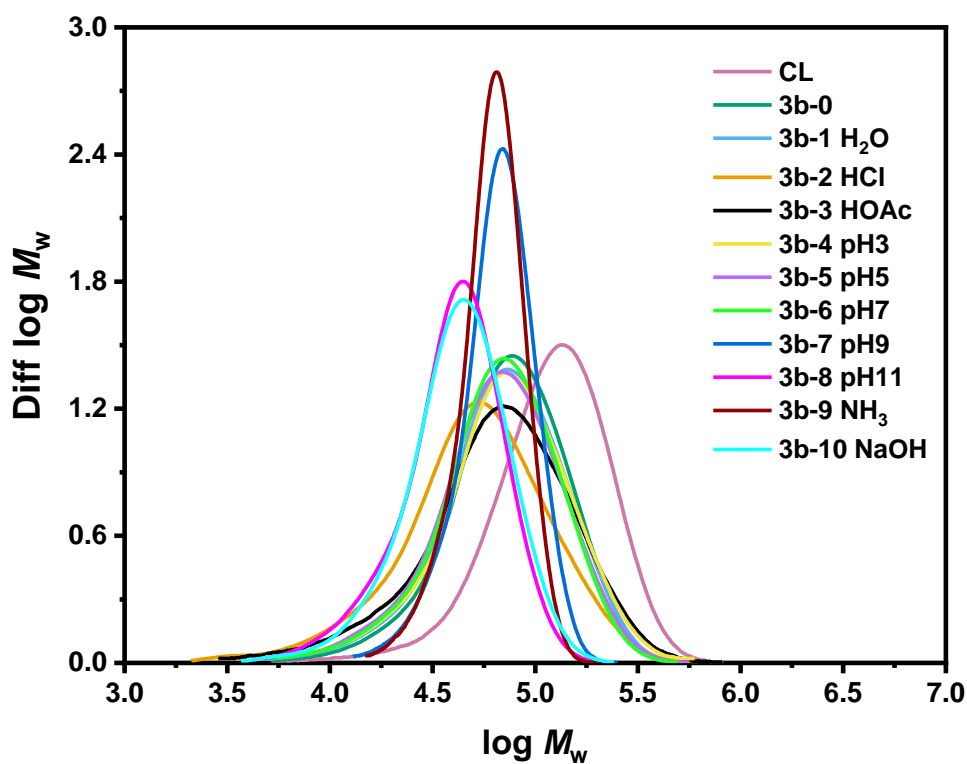

**Figure S7.** Molecular weight distributions according to GPC for experiments **3b**.



#### 4) Preparation of solutions for Experiments 3

**Solvent 1:** H<sub>2</sub>O

**Solvent 2:** 0.5 M HCl

Diluted 20.8 mL 36% HCl to 500 mL

**Solvent 3:** 0.5 M HOAc

Dissolved 15 g HOAc (100%) in 500 mL H<sub>2</sub>O

**Solvent 4:** pH3 buffer 0.5 M (Universal Buffer)

Dissolved 0.125 mol citric acid monohydrate (26.27g) and 0.065 mol Na<sub>2</sub>HPO<sub>4</sub> (9.18 g) in 250 mL H<sub>2</sub>O

**Solvent 5:** pH5 buffer 0.5 M (Universal Buffer)

Dissolved 0.059 mol citric acid monohydrate (12.37 g) and 0.125 mol Na<sub>2</sub>HPO<sub>4</sub> (17.75 g) in 250 mL H<sub>2</sub>O

**Solvent 6:** pH7 buffer 0.5 M (Universal Buffer)

Dissolved 0.013 mol citric acid monohydrate (2.81 g) and 0.065 mol Na<sub>2</sub>HPO<sub>4</sub> (17.75 g) in 250 mL H<sub>2</sub>O

**Solvent 7:** pH9 buffer 0.5 M (NH<sub>3</sub> / NH<sub>4</sub>Cl )

Dissolved 0.125 mol NH<sub>4</sub>Cl (6.7 g) and 0.072 mol NH<sub>3</sub> (4.4 mL of 32% solution) in 250 mL H<sub>2</sub>O

**Solvent 8:** pH11 buffer 0.5 M (Na<sub>2</sub>HPO<sub>4</sub> / NaOH)

Dissolved 0.125 mol Na<sub>2</sub>HPO<sub>4</sub> (17.75 g) and 0.021 mol NaOH (0.82 g) in 250 mL H<sub>2</sub>O

**Solvent 9:** 0.5 M NH<sub>3</sub>

Diluted 15.2 mL 32% NH<sub>3</sub> to 500 mL

**Solvent 10:** 0.5 M NaOH

Dissolved 10 g NaOH (100%) in 500 mL H<sub>2</sub>O
